# Supplementary material for: Metalation studies of 3- and 4-pyridyloxycyclophosphazenes: metallamacrocycles to coordination polymers
Source: Royal Society of Chemistry journal article supplement (doi:10.1039/c3dt33084b), 2013-01-01
Supplement: c3dt33084b.pdf [file c3dt33084b.pdf]

**Electronic Supplementary Information**

**Metalation Studies of 3- and 4-Pyridyloxycyclophosphazenes:**

**Metallamacrocycles to Coordination Polymers**

**Vadapalli Chandrasekhar\* and Ramakirushnan Suriyanarayanan**

Department of Chemistry, Indian Institute of Technology, Kanpur, Kanpur 208 016, India

Corresponding Author:

Email: [vc@iitk.ac.in](mailto:vc@iitk.ac.in); Tel: +91 512 259 7259. Fax: +91 512 259 7436.

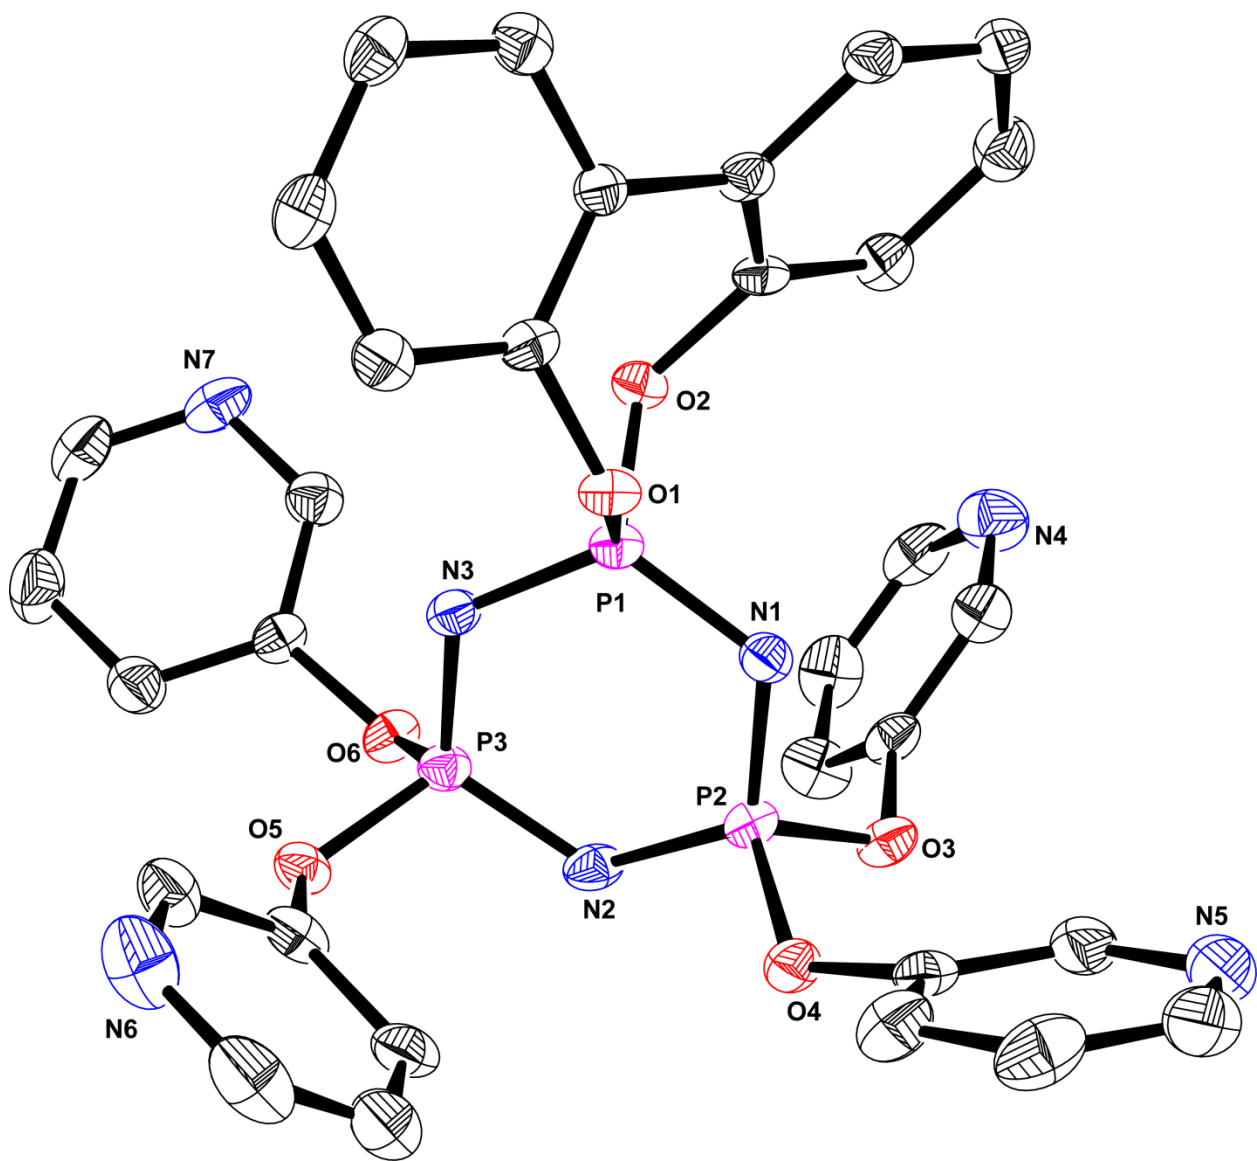

Fig. S1 ORTEP diagram of Ligand L1 (50% probability)

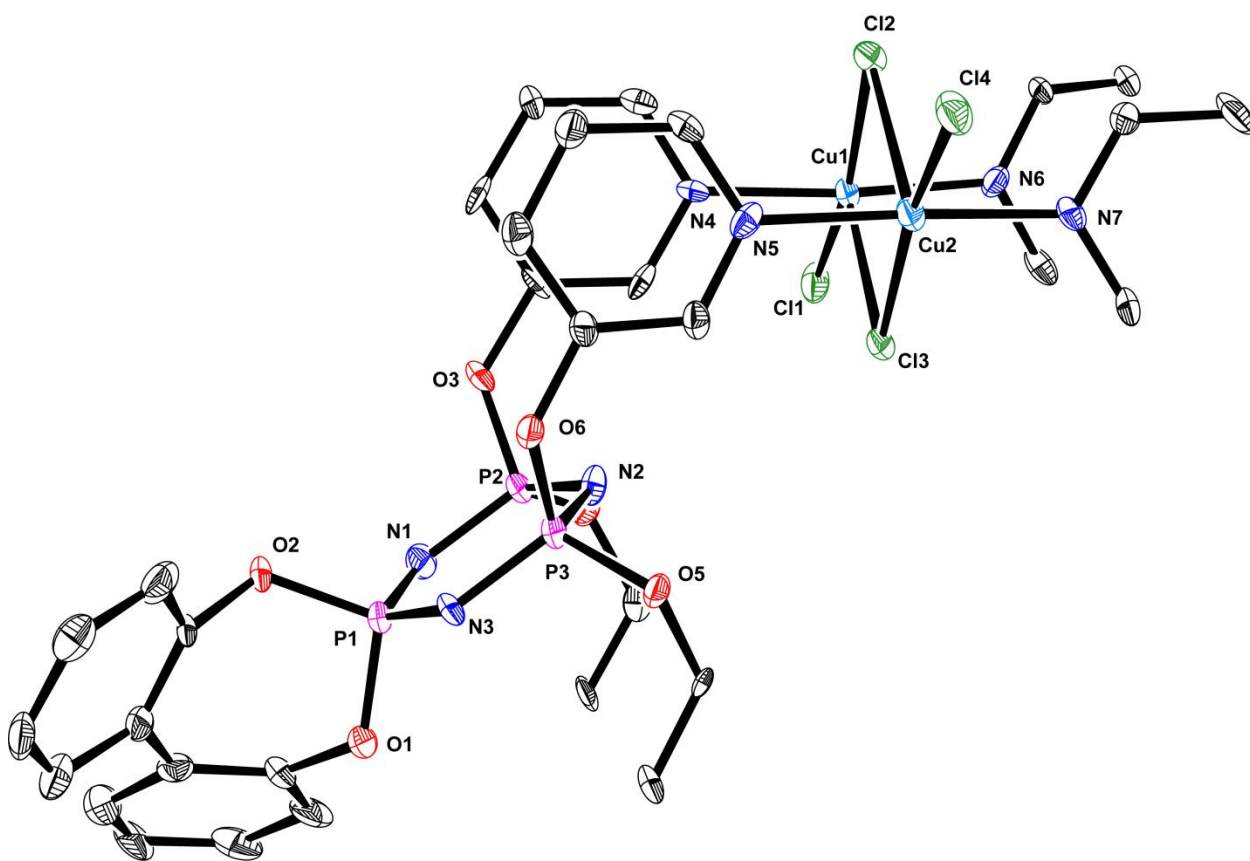

Fig. S2 ORTEP diagram of the asymmetric unit of **3**

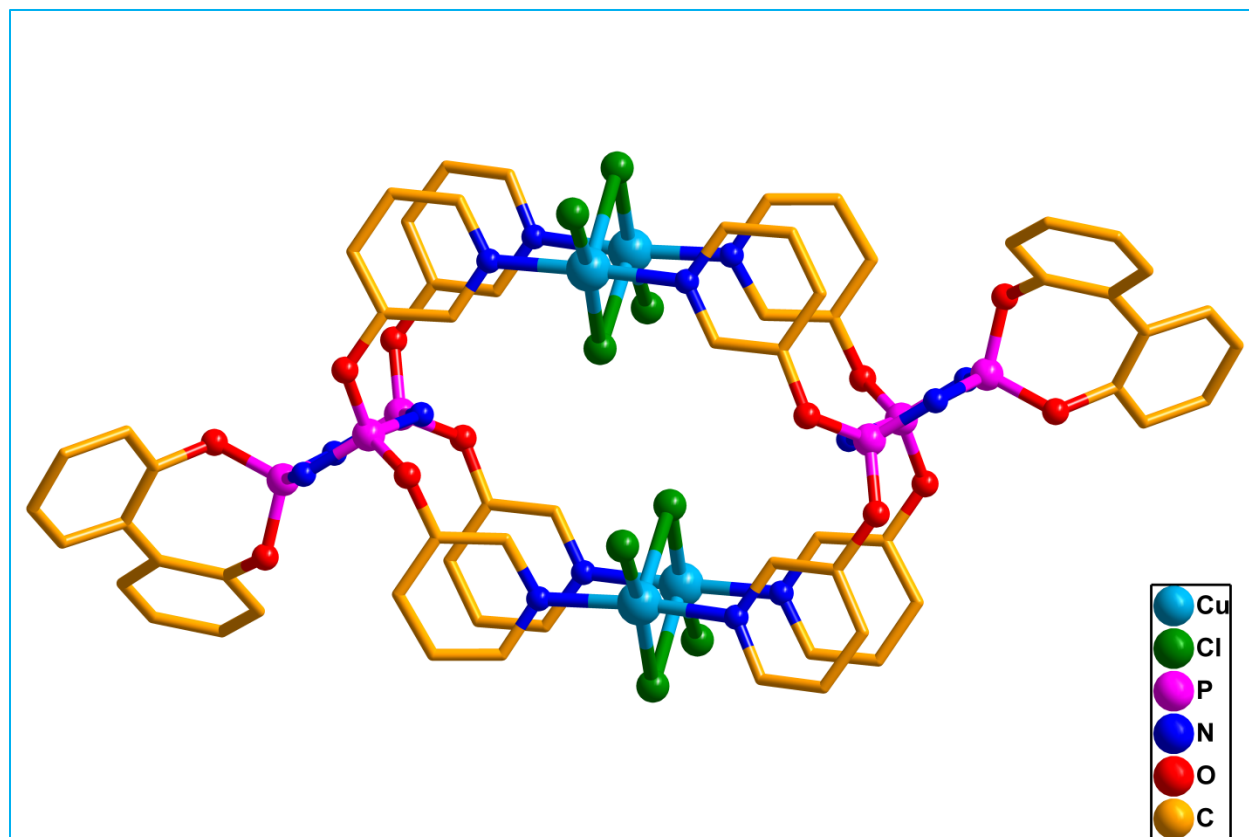

Fig. S3 Another view of 3

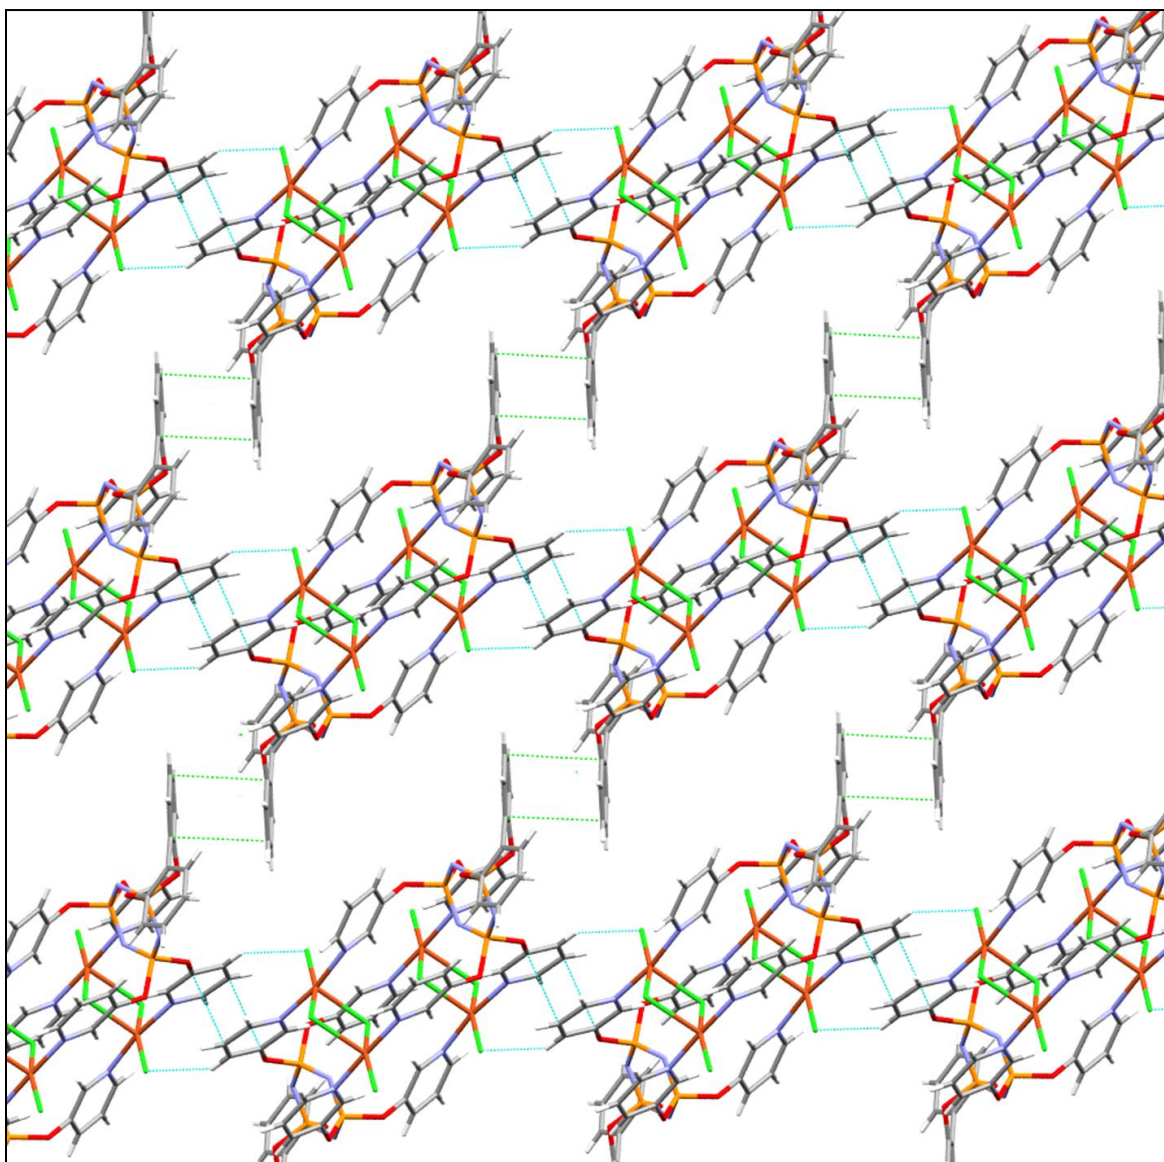

Fig. S4 2D supramolecular network formation in compound **3** along *b* axis via  $\pi$ - $\pi$  staking between 3-oxypyridine rings(3.337 Å) and also biphenyloxy rings(3.83 Å) Diagram also shows the H...Cl (2.671 Å) interactions between coordinated chlorine atom and hydrogen atom of 3-oxypyridine units

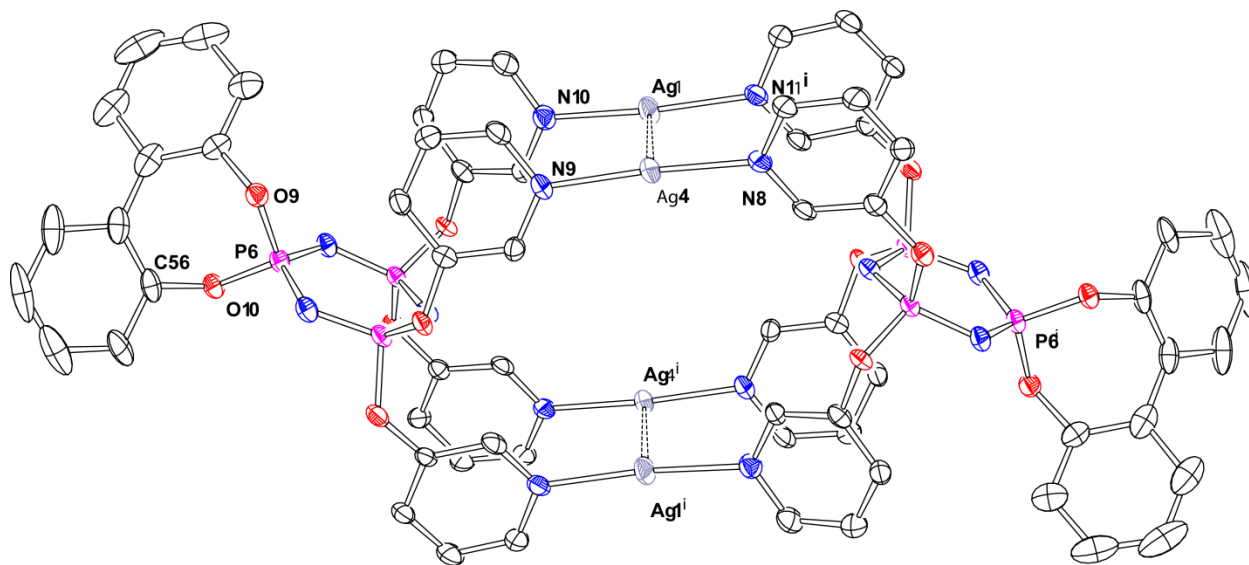

Fig. S5 ORTEP diagram of **4**. Anions, solvent and hydrogen atoms have been omitted for clarity.

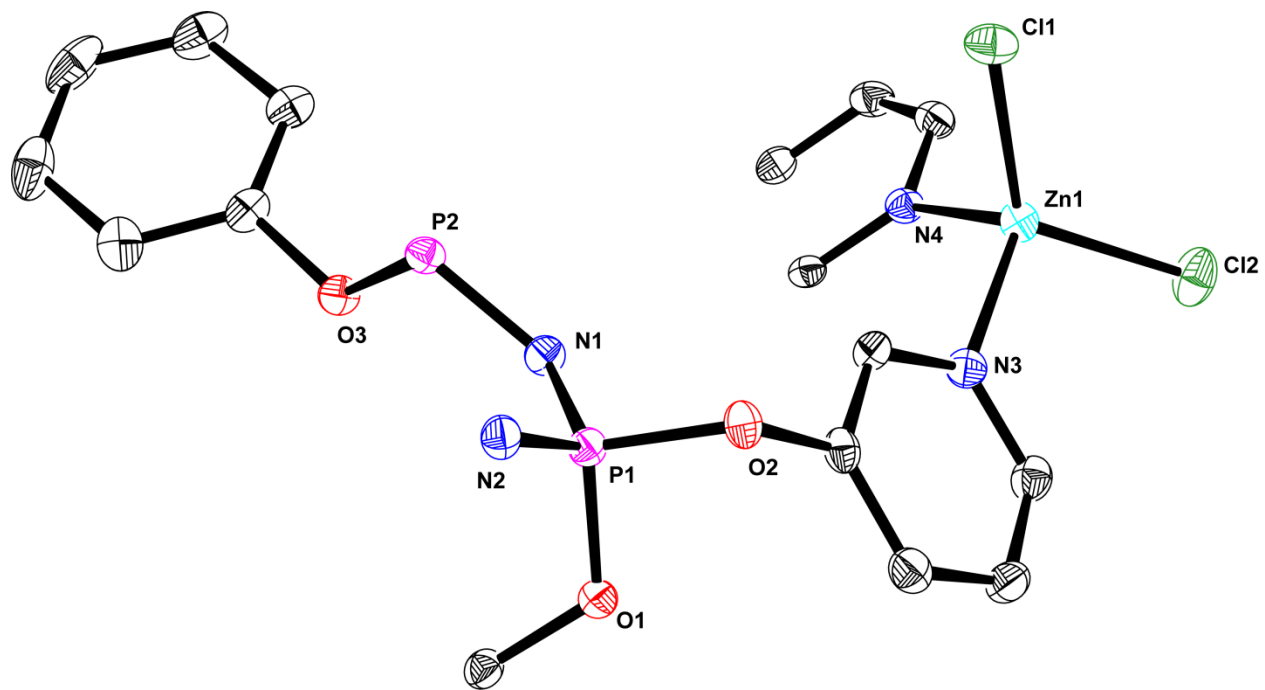

Fig. S6 ORTEP diagram showing the asymmetric unit of **5** (solvent molecules have been omitted for clarity)

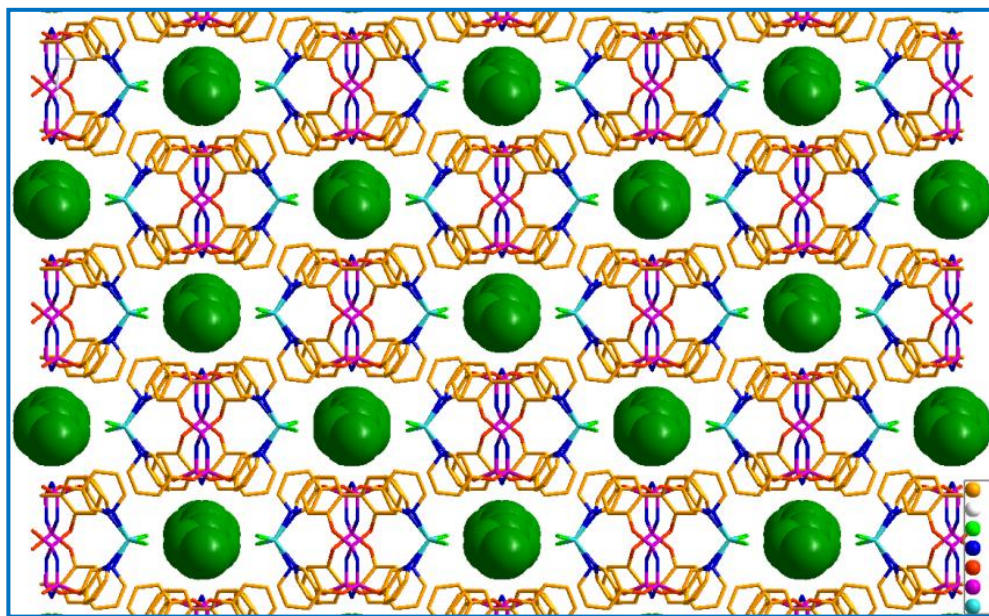

Fig. S7 Molecular packing view of **5** along crystallographic *c* axis (hydrogen atoms have been omitted for clarity; disordered MeOH molecules are shown as a green colored space filling model)



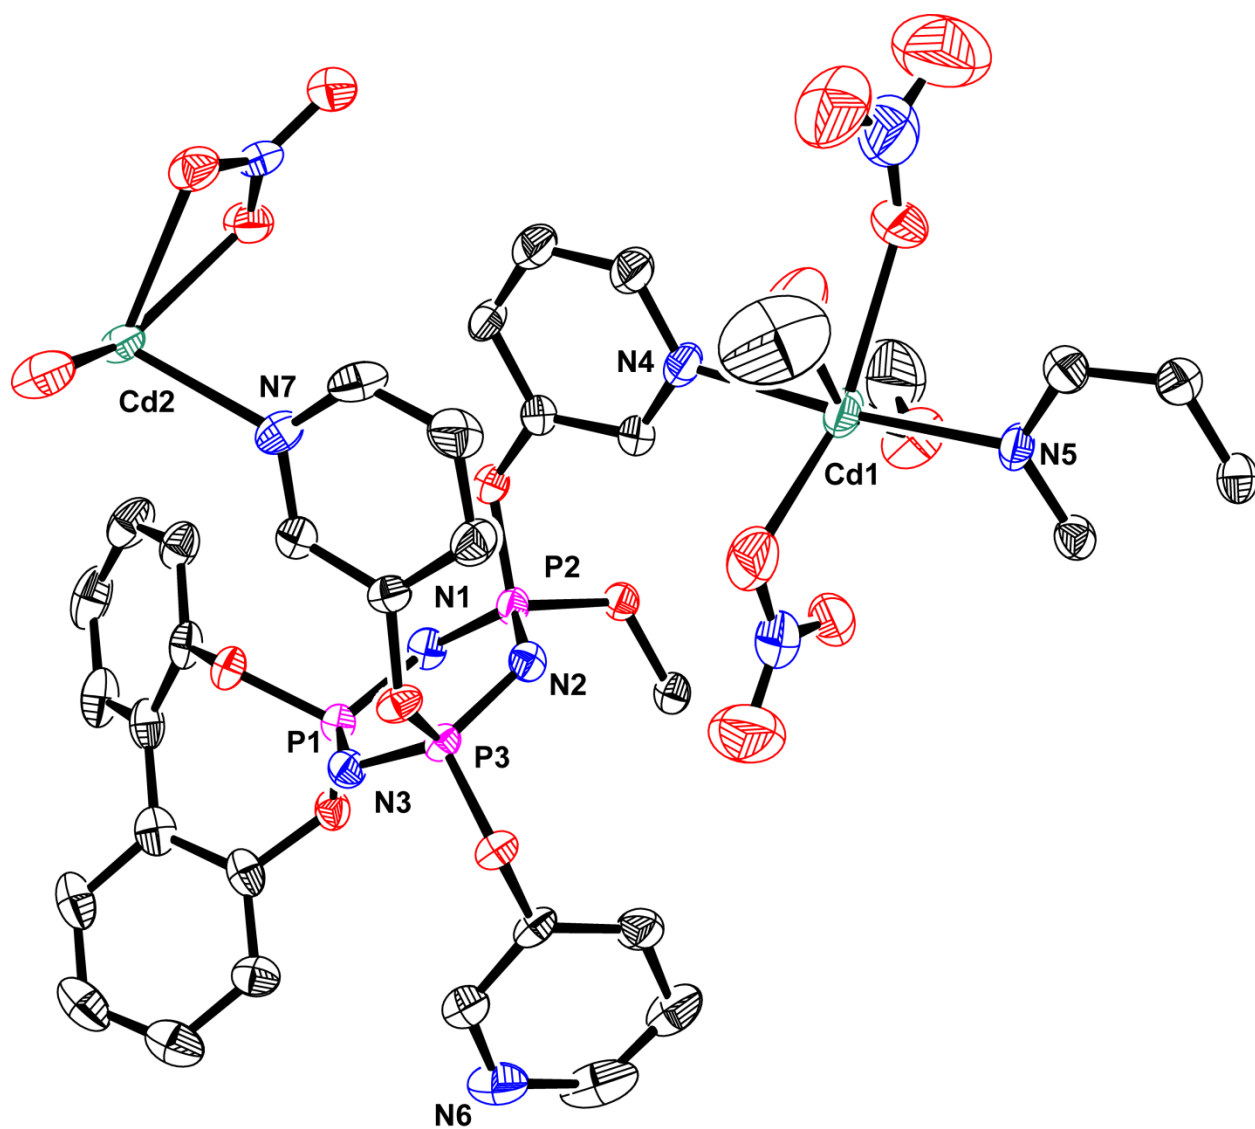

Fig. S8 ORTEP diagram showing the asymmetric unit of **6**

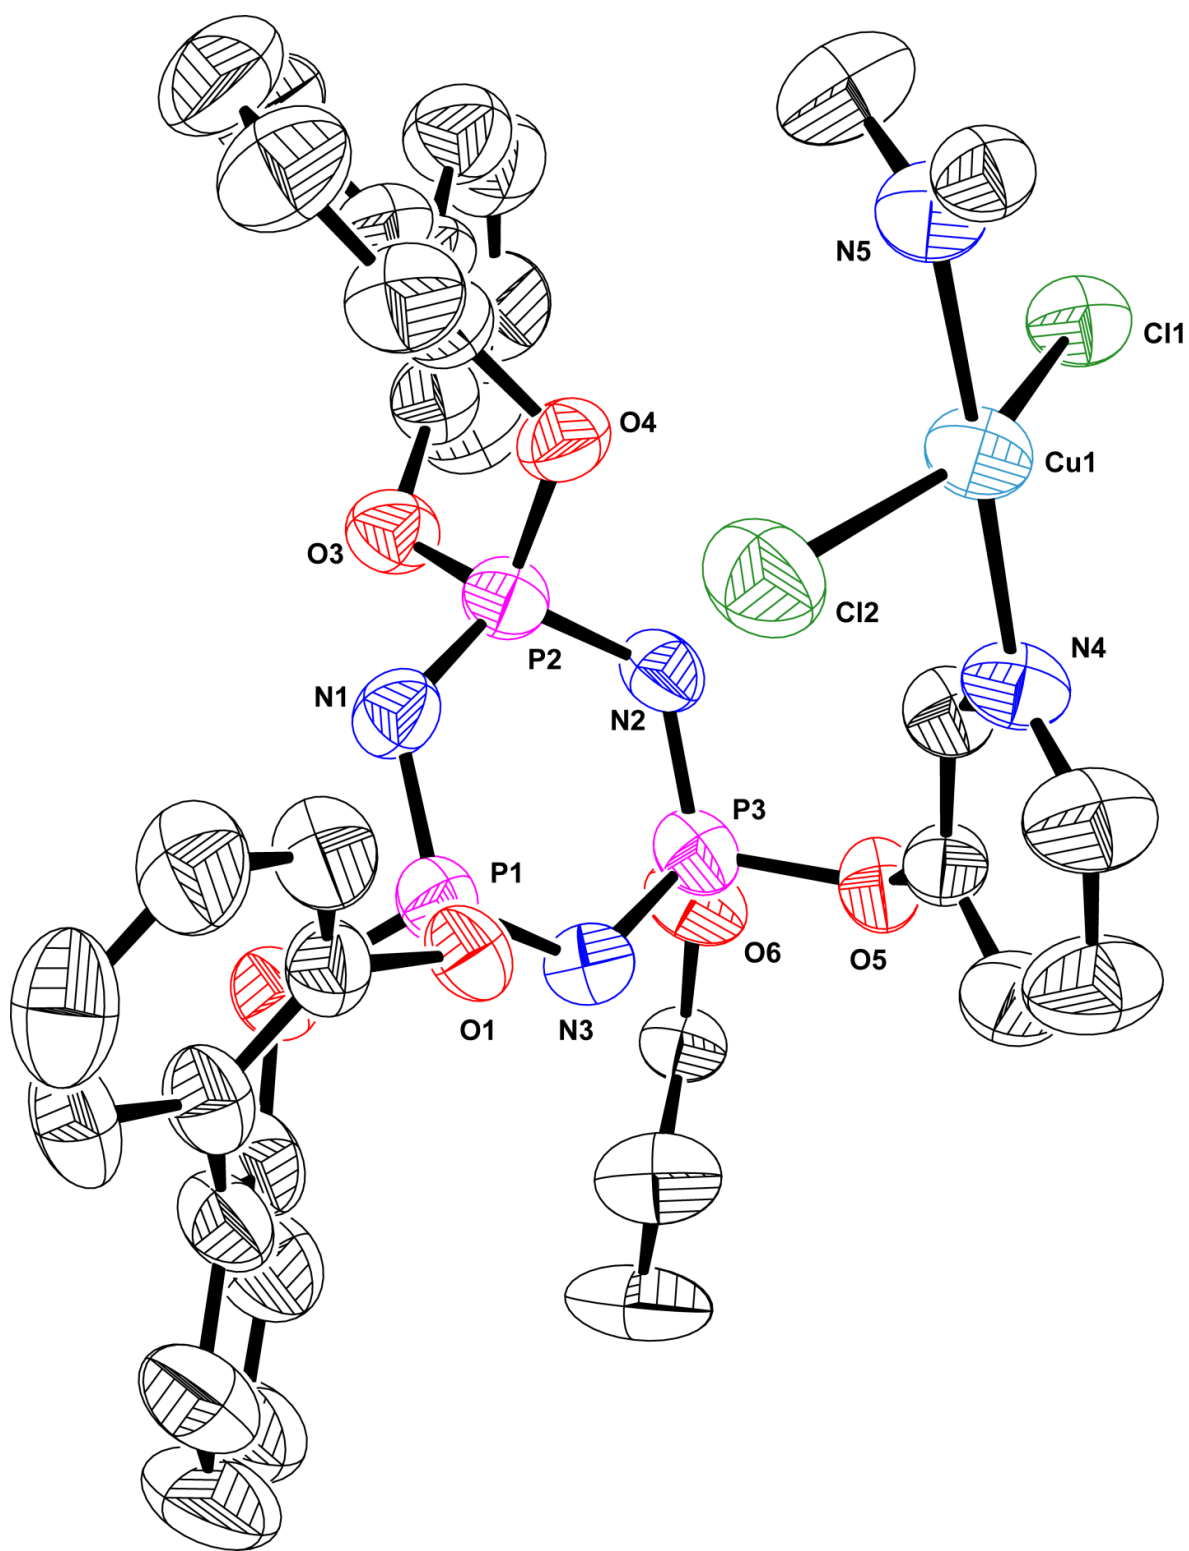

Fig. S9 ORTEP diagram of **8**

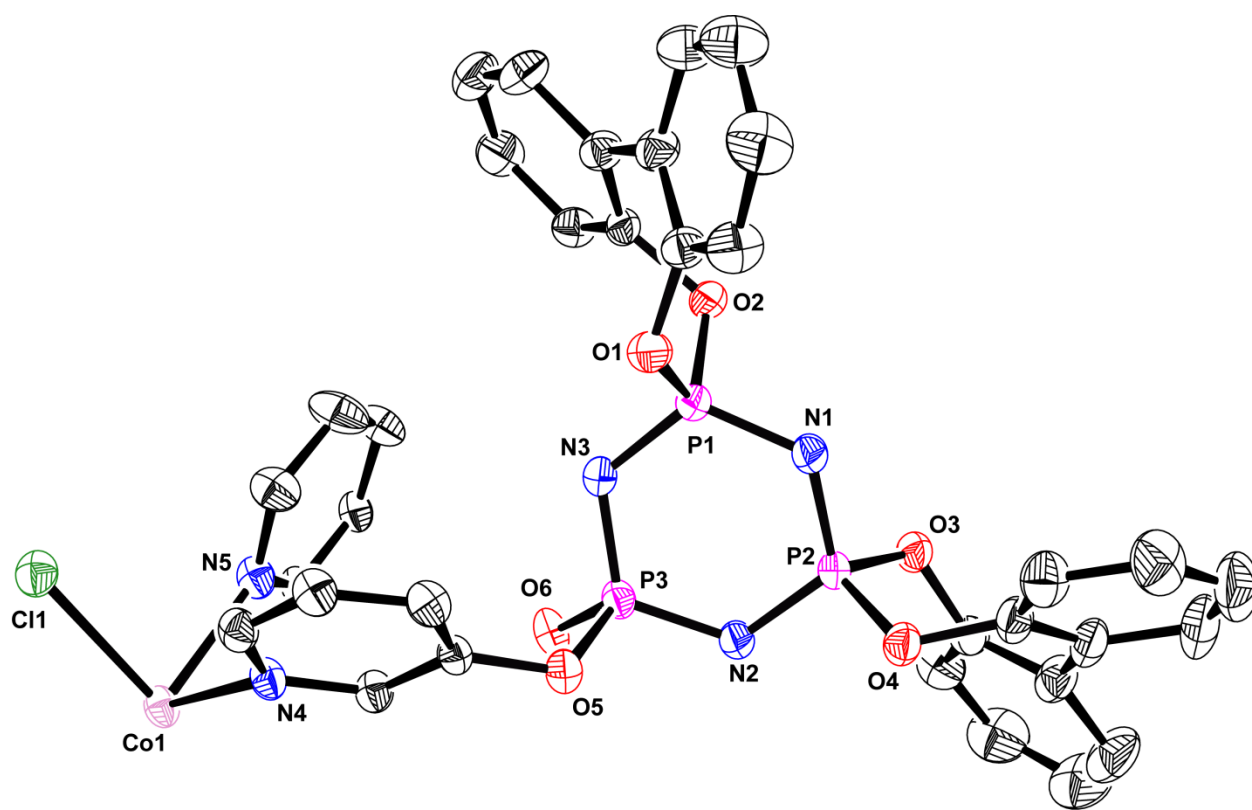

Fig. S10 ORTEP diagram of the asymmetric unit of **7**

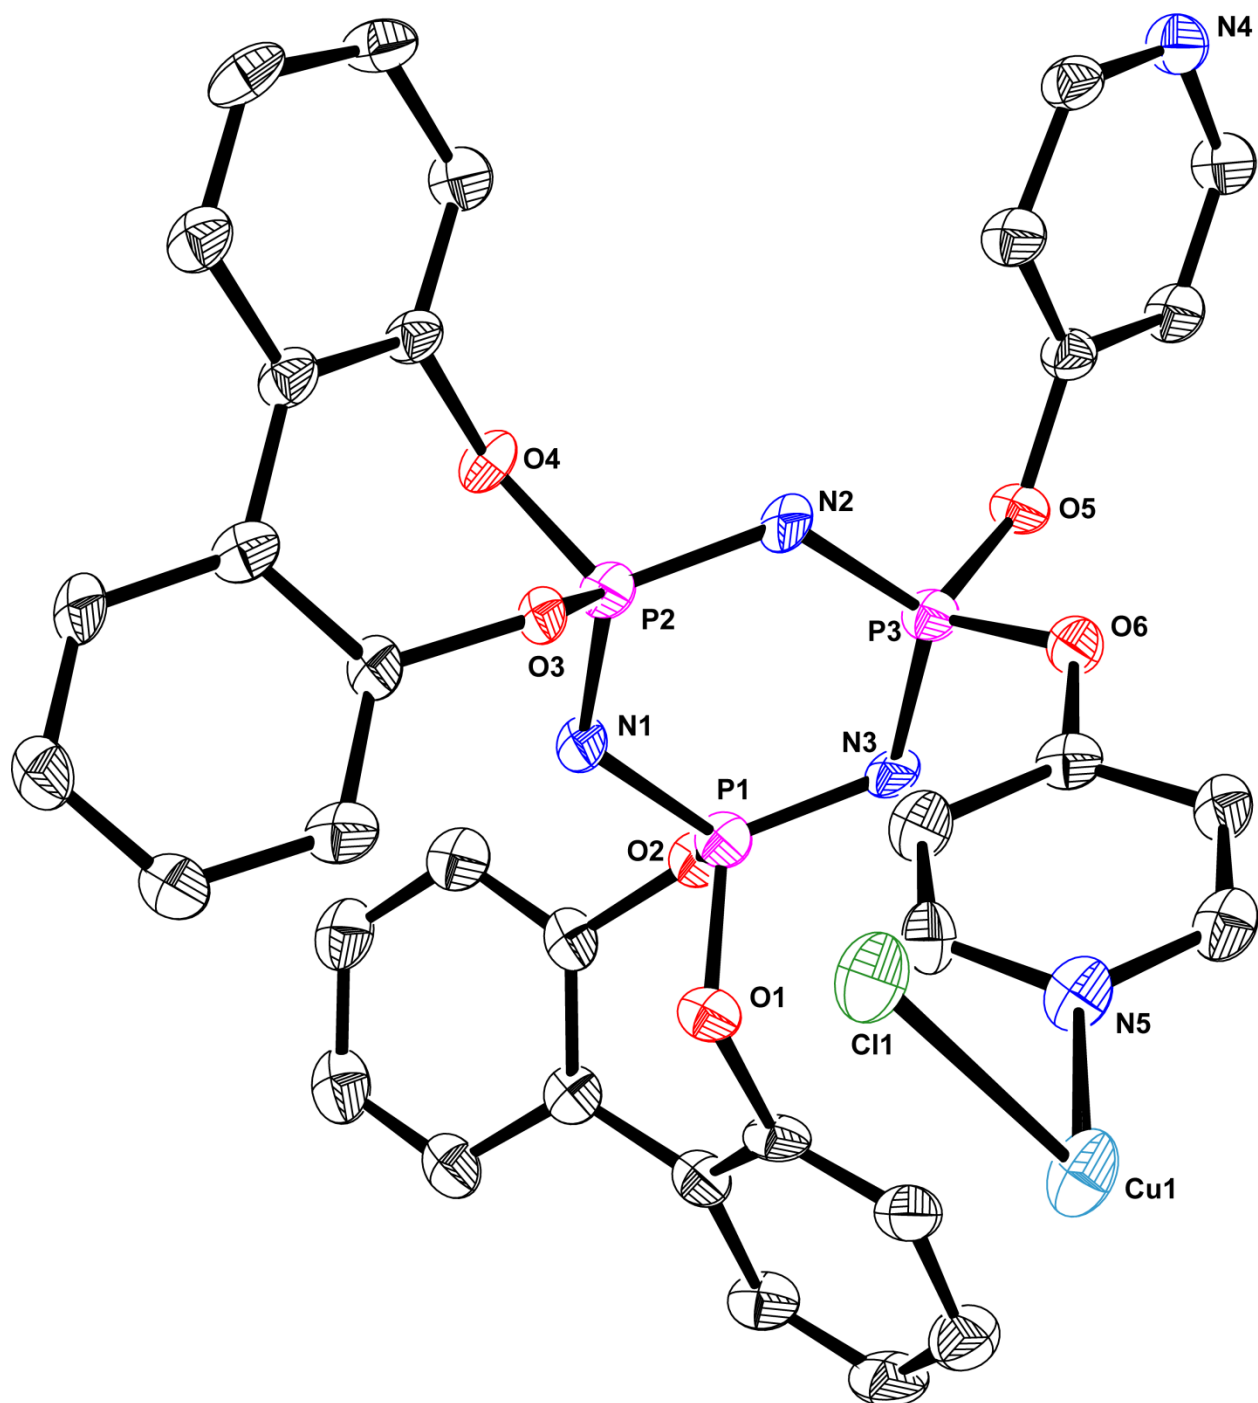

Fig. S11 ORTEP diagram of the asymmetric unit of **9**

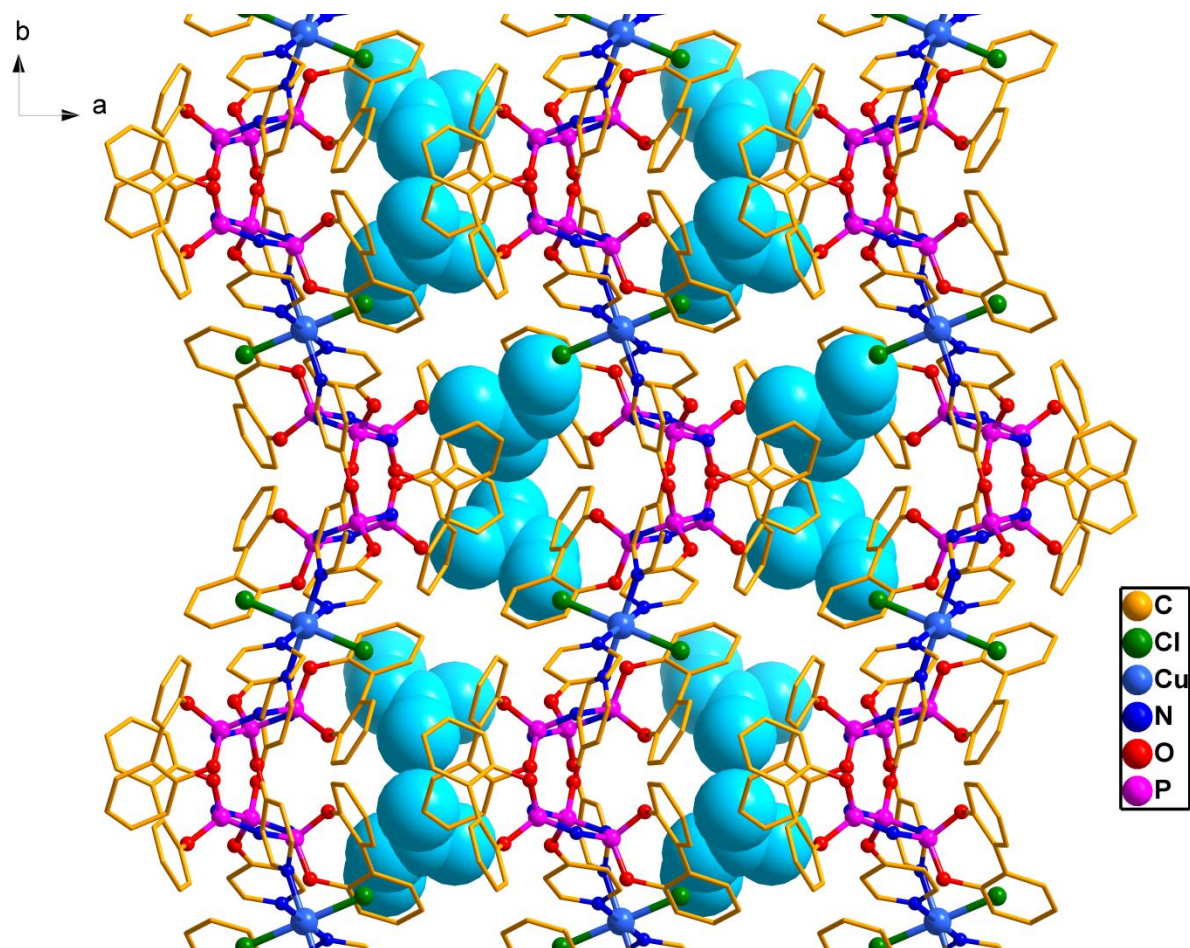

Fig. S12 Packing diagram of **9** in the crystallographic '*c*' axis. DMF molecules (space filling model) occupy the space between two layers of (4, 4) 2D nets of **9**

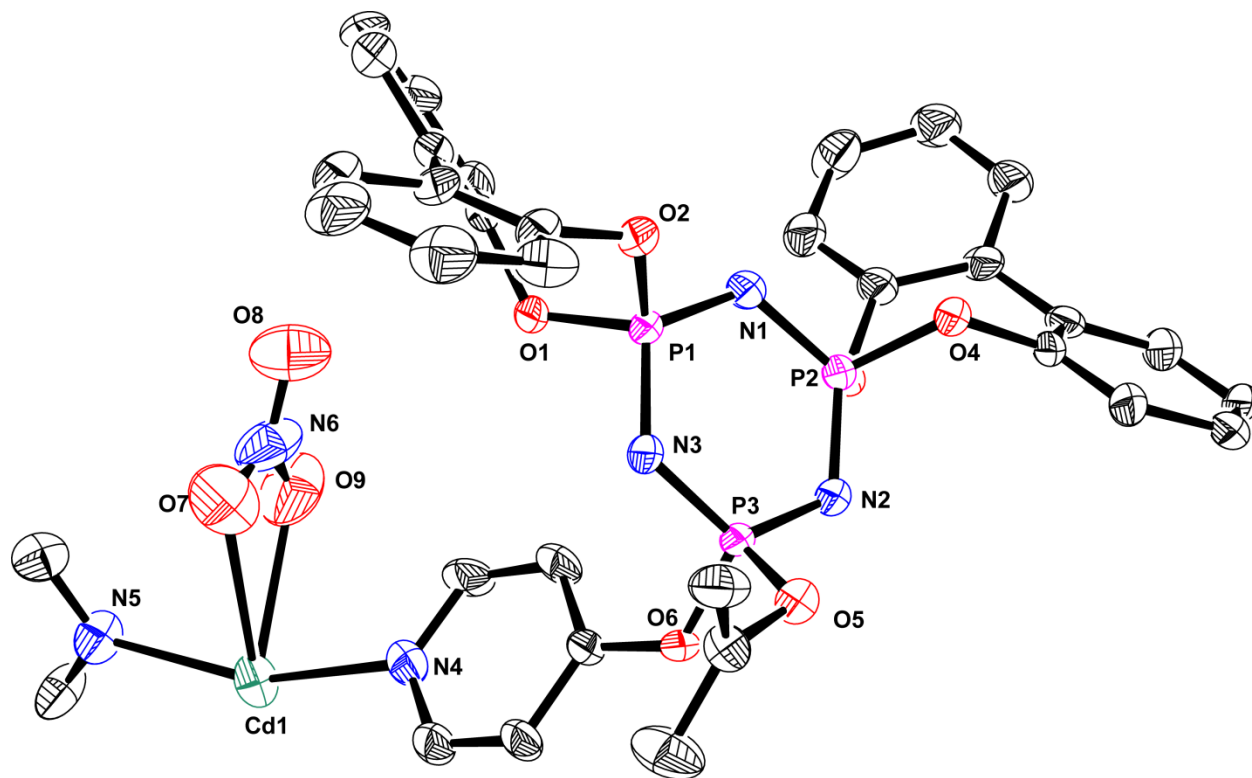

Fig. S13 ORTEP diagram of asymmetric unit of **10**

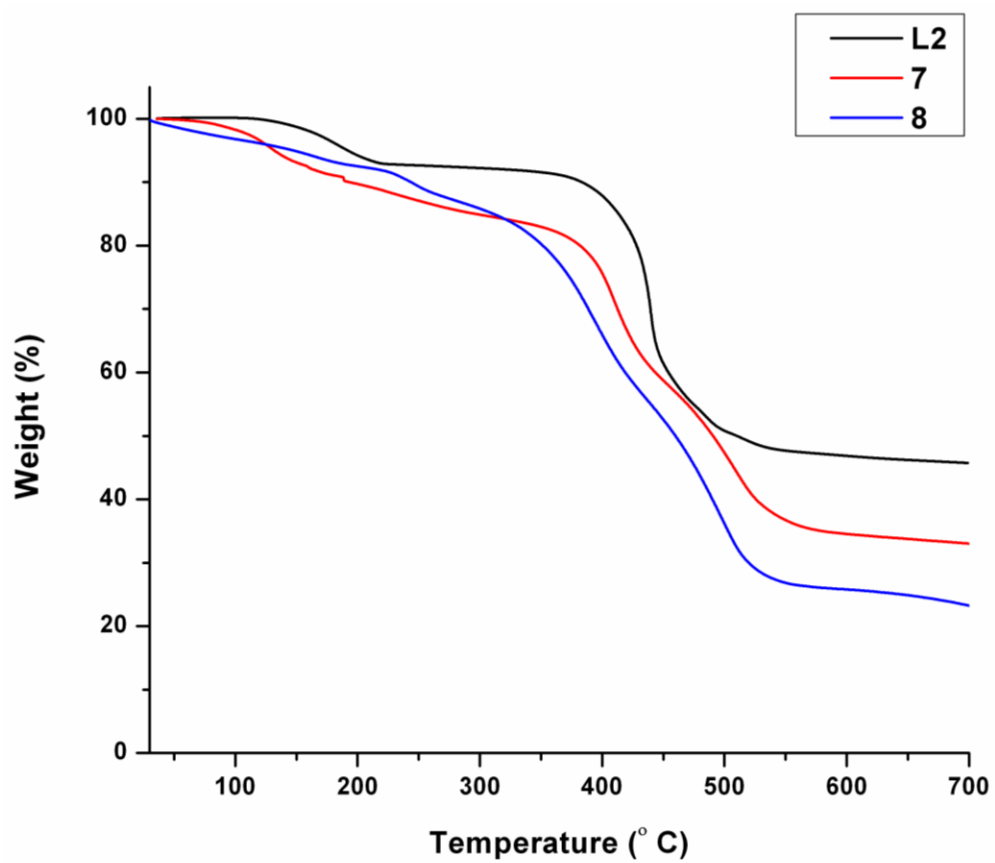

Fig. S14 Thermogravimetric analysis curves for compounds **L2**, **7**, **8**

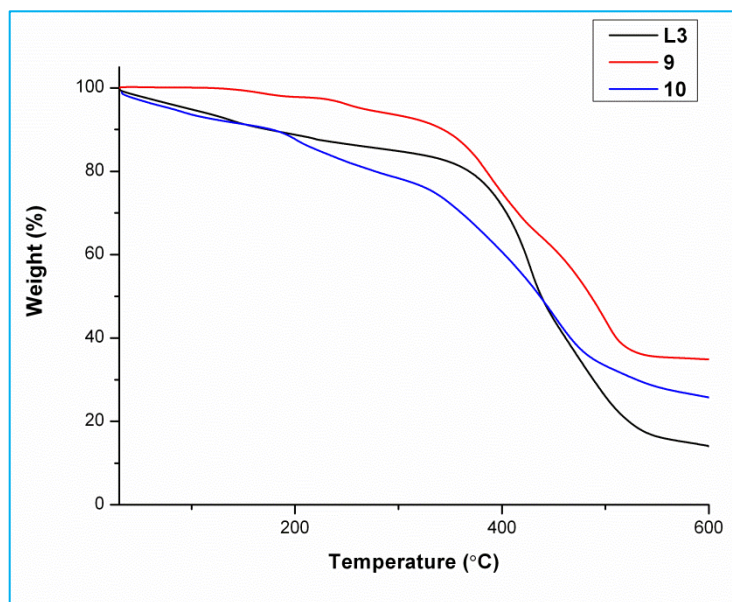

Fig. S15 Thermogravimetric analysis curves for compounds **L3, 9, 10**



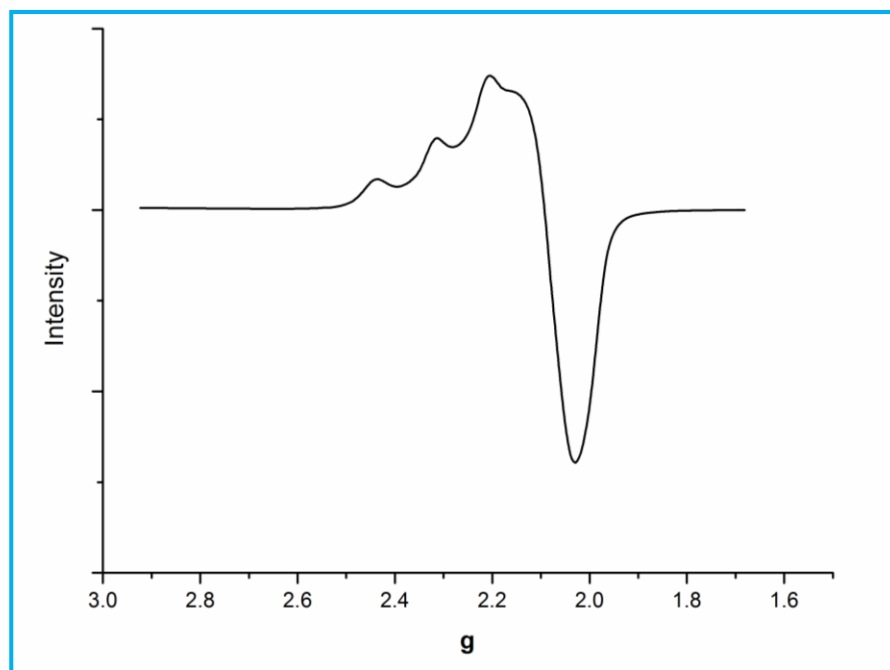

Fig. S16 EPR spectrum of **9** in DMF-toluene glass at -120 °C

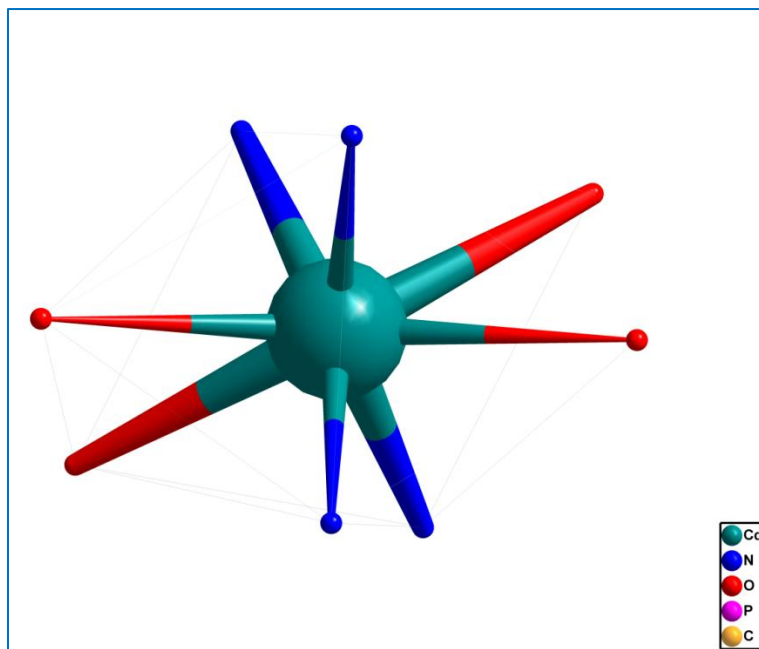

Fig. S17 A view of the square antiprismatic Cd(II) center in the compound **10**

**Table S1** P-N and P-O bond distances and P-N-P and N-P-N bond angles for compounds **L1**, **3-6**

| Compound  | P-N and P-O bond distance (Å)                                                                                                          |                                                                                                                                  | P-N-P and N-P-N bond angle (°)                                                                                                                                             |
|-----------|----------------------------------------------------------------------------------------------------------------------------------------|----------------------------------------------------------------------------------------------------------------------------------|----------------------------------------------------------------------------------------------------------------------------------------------------------------------------|
| <b>L1</b> | P(1)-N(1) 1.575(4)<br>P(1)-N(3) 1.592(4)<br>P(2)-N(1) 1.576(4)<br>P(2)-N(2) 1.580(4)<br>P(3)-N(2) 1.575(4)<br>P(3)-N(3) 1.581(4)       | P(1)-O(1) 1.589(3)<br>P(1)-O(2) 1.600(3)<br>P(2)-O(3) 1.580(3)<br>P(2)-O(4) 1.591(3)<br>P(3)-O(5) 1.585(3)<br>P(3)-O(6) 1.588(3) | N(1)-P(1)-N(3) 117.39(16)<br>N(1)-P(2)-N(2) 118.18(15)<br>N(3)-P(3)-N(2) 118.02(15)<br>P(1)-N(1)-P(2) 122.13(18)<br>P(2)-N(2)-P(3) 121.67(19)<br>P(3)-N(3)-P(1) 122.14(18) |
| <b>3</b>  | P(1)-N(1) 1.567(5)<br>P(1)-N(3) 1.573(5)<br>P(2)-N(1) 1.576(5)<br>P(2)-N(2) 1.584(5)<br>P(3)-N(2) 1.576(5)<br>P(3)-N(3) 1.583(5)       | P(1)-O(1) 1.584(4)<br>P(1)-O(2) 1.590(4)<br>P(2)-O(3) 1.593(4)<br>P(2)-O(4) 1.587(4)<br>P(3)-O(5) 1.592(4)<br>P(3)-O(6) 1.574(4) | N(1)-P(1)-N(3) 118.1(2)<br>N(1)-P(2)-N(2) 117.4(3)<br>N(3)-P(3)-N(2) 117.3(3)<br>P(1)-N(1)-P(2) 121.8(3)<br>P(2)-N(2)-P(3) 121.0(3)<br>P(3)-N(3)-P(1) 121.5(3)             |
| <b>4</b>  | P(1)-N(1) 1.562(4)<br>P(1)-N(3) 1.588(3)<br>P(2)-N(1) 1.583(3)<br>P(2)-N(2) 1.586(3)<br>P(3)-N(2) 1.563(3)<br>P(3)-N(3) 1.583(3)       | P(1)-O(1) 1.584(3)<br>P(1)-O(2) 1.583(3)<br>P(2)-O(3) 1.587(3)<br>P(2)-O(4) 1.596(3)<br>P(3)-O(5) 1.581(3)<br>P(3)-O(6) 1.590(3) | N(1)-P(1)-N(3) 117.63(2)<br>N(1)-P(2)-N(2) 118.17(2)<br>N(3)-P(3)-N(2) 118.05(2)<br>P(1)-N(1)-P(2) 122.0(2)<br>P(2)-N(2)-P(3) 120.2(2)<br>P(3)-N(3)-P(1) 121.3(2)          |
| <b>5</b>  | P(1)-N(1) <sup>#1</sup> 1.583(4)<br>P(1)-N(1) 1.583(4)<br>P(2)-N(2) 1.574(3)<br>P(2)-N(1) 1.581(4)<br>N(2)-P(2) <sup>#1</sup> 1.574(3) | P(1)-O(1) <sup>#1</sup> 1.584(4)<br>P(1)-O(1) 1.585(4)<br>P(2)-O(2) 1.582(4)<br>P(2)-O(3) 1.593(4)                               | N(1) <sup>#1</sup> -P(1)-N(1) 117.8(3)<br>N(2)-P(2)-N(1) 118.0(3)<br>P(2)-N(1)-P(1) 122.0(3)<br>P(2) <sup>#1</sup> -N(2)-P(2) 122.3(4)                                     |
| <b>6</b>  | P(1)-N(1) 1.570(5)<br>P(1)-N(3) 1.576(5)<br>P(2)-N(1) 1.575(5)<br>P(2)-N(2) 1.578(5)<br>P(3)-N(2) 1.572(5)<br>P(3)-N(3) 1.580(5)       | O(1)-P(1) 1.585(4)<br>O(2)-P(1) 1.579(4)<br>O(3)-P(2) 1.582(4)<br>O(4)-P(2) 1.583(4)<br>O(5)-P(3) 1.590(4)<br>O(6)-P(3) 1.591(5) | N(1)-P(1)-N(3) 117.2(3)<br>N(1)-P(2)-N(2) 115.5(3)<br>N(3)-P(3)-N(2) 118.0(3)<br>P(1)-N(1)-P(2) 123.5(3)<br>P(2)-N(2)-P(3) 122.0(3)<br>P(3)-N(3)-P(1) 120.2(3)             |

(a)Symmetry transformations used to generate equivalent atoms: #1 1 -x, -y, 1-z

**Table S2** Mean plane data for compounds **L1**, **3-6**

| Atoms | Distances from the mean plane (Å) |          |          |               |          |
|-------|-----------------------------------|----------|----------|---------------|----------|
|       | <b>L1</b>                         | <b>3</b> | <b>4</b> | <b>5</b>      | <b>6</b> |
| P(1)  | 0.0055                            | -0.0144  | 0.0262   | -0.0006       | -0.0019  |
| P(2)  | 0.0019                            | 0.0129   | -0.0096  | 0             | 0.0015   |
| P(3)  | -0.0090                           | 0.0028   | 0.0060   | 0.0006 (P2*)  | -0.0140  |
| N(1)  | -0.0720                           | 0.1572   | -0.0659  | 0.0073        | -0.0576  |
| N(2)  | 0.0598                            | 0.0639   | -0.1795  | 0             | -0.0879  |
| N(3)  | 0.0258                            | 0.0489   | 0.0818   | -0.0073 (N1*) | 0.1276   |

**Table S3** P-N and P-O bond distances and P-N-P and N-P-N bond angles for compounds **7** and **8**

| Compound | P-N and P-O bond distance (Å) |                    | P-N-P and N-P-N bond angle (°) |
|----------|-------------------------------|--------------------|--------------------------------|
| <b>7</b> | P(1)-N(1) 1.571(3)            | P(1)-O(1) 1.581(3) | N(1)-P(1)-N(3) 118.23(17)      |
|          | P(1)-N(3) 1.574(3)            | P(1)-O(2) 1.590(3) | N(2)-P(2)-N(1) 117.60(16)      |
|          | P(2)-N(1) 1.580(3)            | P(2)-O(4) 1.580(3) | N(3)-P(3)-N(2) 117.68(16)      |
|          | P(2)-N(2) 1.572(3)            | P(2)-O(3) 1.581(3) | P(1)-N(1)-P(2) 120.43(19)      |
|          | P(3)-N(2) 1.587(3)            | P(3)-O(5) 1.576(3) | P(2)-N(2)-P(3) 121.87(19)      |
|          | P(3)-N(3) 1.571(3)            | P(3)-O(6) 1.578(3) | P(3)-N(3)-P(1) 120.61(19)      |
| <b>8</b> | P(1)-N(1) 1.564(7)            | P(1)-O(1) 1.570(6) | N(1)-P(1)-N(3) 117.7(3)        |
|          | P(1)-N(3) 1.577(7)            | P(1)-O(2) 1.582(5) | N(1)-P(2)-N(2) 117.1(3)        |
|          | P(2)-N(1) 1.560(7)            | P(2)-O(3) 1.570(5) | N(3)-P(3)-N(2) 117.8(3)        |
|          | P(2)-N(2) 1.567(6)            | P(2)-O(4) 1.582(5) | P(2)-N(1)-P(1) 123.0(4)        |
|          | P(3)-N(3) 1.565(7)            | P(3)-O(5) 1.579(5) | P(2)-N(2)-P(3) 122.2(4)        |
|          | P(3)-N(2) 1.581(6)            | P(3)-O(6) 1.594(5) | P(3)-N(3)-P(1) 121.3(4)        |

**Table S4** Mean plane data for compounds **7** and **8**

| <b>Atoms</b> | Distances from the mean plane (Å) |          |
|--------------|-----------------------------------|----------|
|              | <b>7</b>                          | <b>8</b> |
| P(1)         | 0.0288                            | 0.0091   |
| P(2)         | -0.0044                           | -0.0056  |
| P(3)         | -0.0094                           | 0.0075   |
| N(1)         | -0.1703                           | 0.0031   |
| N(2)         | 0.1547                            | 0.0312   |
| N(3)         | 0.1124                            | -0.1100  |

**Table S5** P-N and P-O bond distances and P-N-P and N-P-N bond angles for compounds **L3**, **9** and **10**

| Compound              | P-N and P-O bond distance (Å) |                    | P-N-P and N-P-N bond angle (°) |
|-----------------------|-------------------------------|--------------------|--------------------------------|
| <b>L3<sup>1</sup></b> | P(1)-N(1) 1.582(7)            | P(1)-O(1) 1.584(6) | N(1)-P(1)-N(3) 118.3(4)        |
|                       | P(1)-N(3) 1.584(7)            | P(1)-O(2) 1.601(6) | N(2)-P(2)-N(1) 117.5(4)        |
|                       | P(2)-N(1) 1.581(7)            | P(2)-O(3) 1.575(6) | N(3)-P(3)-N(2) 118.5(4)        |
|                       | P(2)-N(2) 1.577(7)            | P(2)-O(4) 1.588(6) | P(1)-N(1)-P(2) 119.1(4)        |
|                       | P(3)-N(2) 1.576(7)            | P(3)-O(5) 1.572(6) | P(2)-N(2)-P(3) 121.1(4)        |
|                       | P(3)-N(3) 1.578(7)            | P(3)-O(6) 1.588(6) | P(3)-N(3)-P(1) 120.1(4)        |
| <b>9</b>              | P(1)-N(1) 1.578(4)            | P(1)-O(1) 1.581(3) | N(1)-P(1)-N(3) 118.2(2)        |
|                       | P(1)-N(3) 1.573(4)            | P(1)-O(2) 1.566(3) | N(2)-P(2)-N(1) 117.5(2)        |
|                       | P(2)-N(1) 1.574(4)            | P(2)-O(3) 1.578(3) | N(3)-P(3)-N(2) 117.8(2)        |
|                       | P(2)-N(2) 1.562(4)            | P(2)-O(4) 1.591(3) | P(1)-N(1)-P(2) 121.8(2)        |
|                       | P(3)-N(2) 1.583(4)            | P(3)-O(5) 1.584(3) | P(2)-N(2)-P(3) 122.5(3)        |
|                       | P(3)-N(3) 1.556(4)            | P(3)-O(6) 1.574(3) | P(3)-N(3)-P(1) 122.0(2)        |
| <b>10</b>             | P(1)-N(1) 1.577(3)            | P(1)-O(1) 1.593(3) | N(1)-P(1)-N(3) 118.73(16)      |
|                       | P(1)-N(3) 1.574(3)            | P(1)-O(2) 1.594(2) | N(1)-P(2)-N(2) 117.46(15)      |
|                       | P(2)-N(1) 1.572(3)            | P(2)-O(3) 1.580(3) | N(3)-P(3)-N(2) 118.53(15)      |
|                       | P(2)-N(2) 1.582(3)            | P(2)-O(4) 1.586(3) | P(2)-N(1)-P(1) 122.16(18)      |
|                       | P(3)-N(3) 1.580(3)            | P(3)-O(5) 1.584(3) | P(2)-N(2)-P(3) 122.08(19)      |
|                       | P(3)-N(2) 1.576(3)            | P(3)-O(6) 1.587(3) | P(3)-N(3)-P(1) 120.94(18)      |

**Table S6** Mean plane data for compounds **L3**, **9** and **10**

| <b>Atoms</b> | Distances from the mean plane (Å) |          |           |
|--------------|-----------------------------------|----------|-----------|
|              | <b>L3</b>                         | <b>9</b> | <b>10</b> |
| P(1)         | 0.0209                            | -0.0030  | 0.0015    |
| P(2)         | 0.0229                            | 0.0058   | 0.0042    |
| P(3)         | -0.0257                           | 0.0034   | -0.0026   |
| N(1)         | -0.2952                           | -0.0058  | -0.0399   |
| N(2)         | 0.0724                            | -0.0698  | -0.0030   |
| N(3)         | 0.0836                            | 0.0149   | 0.0152    |

Table S7 Coordination geometry around each metal ion in compounds **3-10**

| Compound No. |                                                                                     | Geometry, Coordination Environment around metal |
|--------------|-------------------------------------------------------------------------------------|-------------------------------------------------|
| <b>3</b>     | 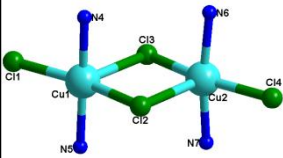   | squarepyramidal,<br>(3Cl, 2N)                   |
| <b>4</b>     |    |                                                 |
| <b>5</b>     |   | Tetrahedral (2Cl, 2N)                           |
| <b>6</b>     |  | Pentagonalbipyramidal (5O, 2N)                  |
|              |  | Pentagonalbipyramidal (5O, 2N)                  |
| <b>7</b>     |  | Octahedral, (4N, 2Cl)                           |



|    |                                                                                                                                                                                                                                                                                                                                                                                                                            |                               |
|----|----------------------------------------------------------------------------------------------------------------------------------------------------------------------------------------------------------------------------------------------------------------------------------------------------------------------------------------------------------------------------------------------------------------------------|-------------------------------|
| 8  | 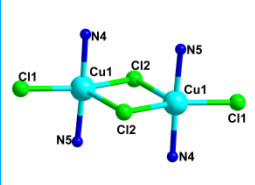 <p>A ball-and-stick model of a copper complex in a square pyramidal geometry. The central copper atom (Cu1) is coordinated to two nitrogen atoms (N4, N5) and two chlorine atoms (Cl1, Cl2). The Cu1 atom is shown in cyan, N atoms in blue, and Cl atoms in green. The geometry is square pyramidal with one axial position vacant.</p> | squarepyramidal,<br>(3Cl, 2N) |
| 9  |  <p>A ball-and-stick model of a copper complex in an octahedral geometry. The central copper atom (Cu1) is coordinated to four nitrogen atoms (N4, N5) and two chlorine atoms (Cl1). The Cu1 atom is shown in cyan, N atoms in blue, and Cl atoms in green. The geometry is octahedral.</p>                                               | Octahedral, ( 4N, 2Cl)        |
| 10 |  <p>A ball-and-stick model of a cadmium complex in a square antiprismatic geometry. The central cadmium atom (Cd1) is coordinated to four nitrogen atoms (N4, N5) and four oxygen atoms (O7, O8). The Cd1 atom is shown in green, N atoms in blue, and O atoms in red. The geometry is square antiprismatic.</p>                          | Square antiprism, ( 4N, 4O)   |

## Mask Details<sup>2,3</sup>

### Compound 6

Electron count 337 (void of 3590 Å) per unit cell accounts for 12 MeOH and 12 water molecules (336 total no. of calculated e<sup>-</sup> (Z=4))

### Squeeze Details:

### Compound 5

Electron count 55 (void of 315.6 Å) per unit cell accounts for 0.5(CH<sub>3</sub>OH+H<sub>2</sub>O) molecules (Z=4)

### Compound 8

Electron count 1091.4(void of 3238 Å) per unit cell accounts for 16CHCl<sub>3</sub> and 8 methanol molecules (1072 total no. of calculated e<sup>-</sup> (Z=8))

### Compound 10

Electron count 440 (void of 1249 Å) per unit cell accounts for 8CHCl<sub>3</sub>, CH<sub>2</sub>Cl<sub>2</sub>and 8 water molecules (440 total no. of calculated e<sup>-</sup> (Z=4))

1. Y. Cho, H. Baek and Y. S. Sohn, *Macromolecules*, 1999, **32**, 2167.
2. (a) A. L. Spek, *J.Appl.Cryst.*, 2003, **36**, 3; (b) P. van der Sluis and A. L. Spek, *Acta Cryst.*, 1990, **A46**, 194.
3. O.V. Dolomanov, L. J. Bourhis, R. J. Gildea, J. A. K. Howard and H. Puschmann, OLEX2: A complete structure solution, refinement and analysis program. *J. Appl. Cryst.*, 2009, **42**, 339.
